# Supplementary material for: Multiplex chemiluminescent immunoassay for screening of mycotoxins using photonic crystal microsphere suspension array
Source: Royal Society of Chemistry journal article supplement (doi:10.1039/c3an02032k), 2013-11-29
Supplement: c3an02032k.pdf [file c3an02032k.pdf]

**Supporting Materials for “Multiplex Chemiluminescent Immunoassay  
for Screening of Mycotoxins Using Photonic crystal Microsphere  
Suspension Array”**

Kun Xu<sup>†</sup>, Yue Sun<sup>†</sup>, Wei Li<sup>†‡</sup>, Jie Xu<sup>†</sup>, Bin Cao<sup>†</sup>, Yunkun Jiang<sup>†</sup>, Tiesong Zheng<sup>†</sup>,  
Jianlin Li<sup>†\*</sup>, and Daodong Pan<sup>†\*</sup>

<sup>†</sup>Department of Food Science and Nutrition, Nanjing Normal University, Nanjing 210097, China

<sup>‡</sup> Department of Chemistry, Glyndŵr University, Wrexham, LL11 2AW, UK.

\*Corresponding authors. Tel.: +86 25 83598286; fax: +86 25 83598901.

E-mail addresses: [jianlinli82003@aliyun.com](mailto:jianlinli82003@aliyun.com), daodongpan@163.com

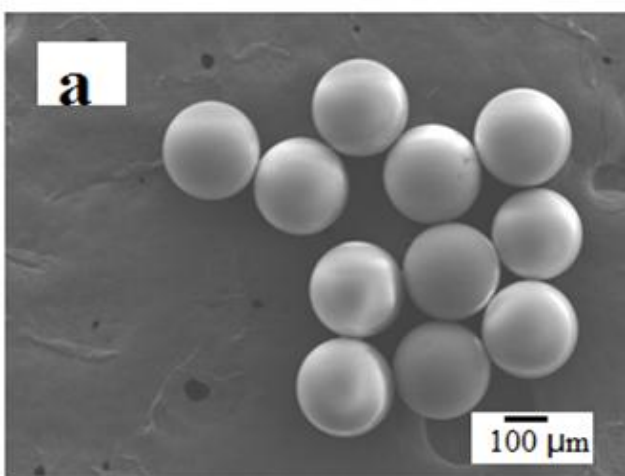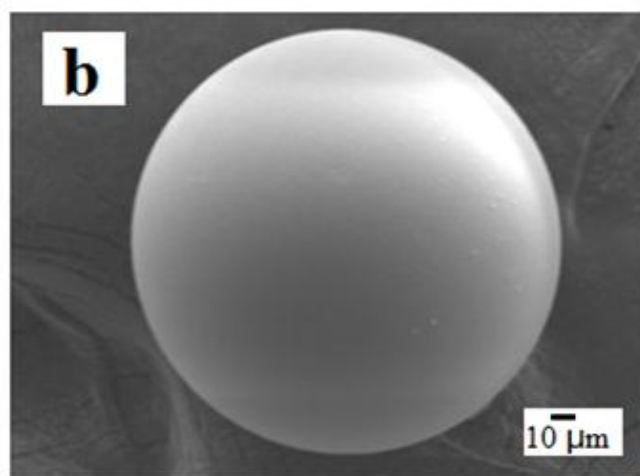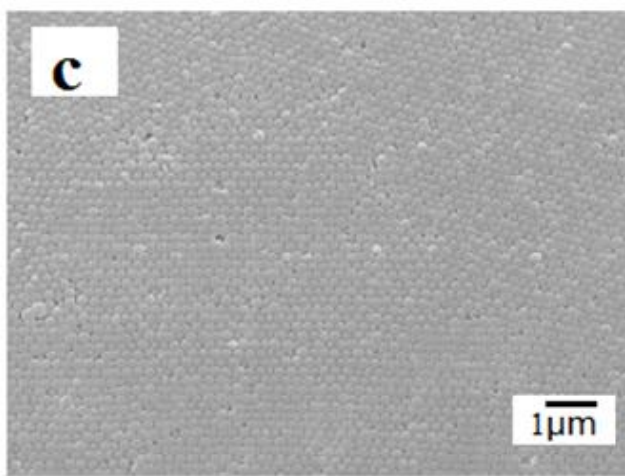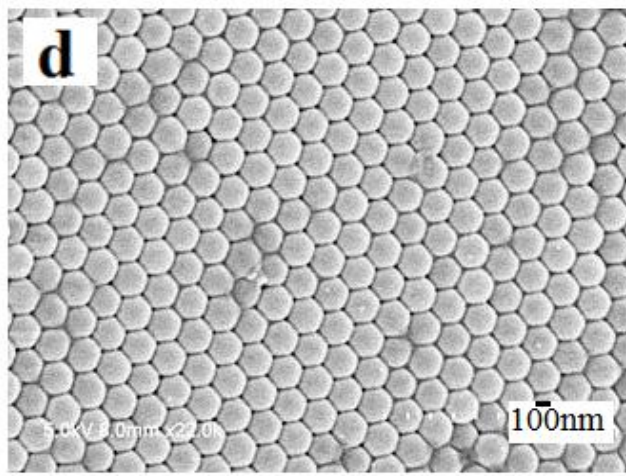

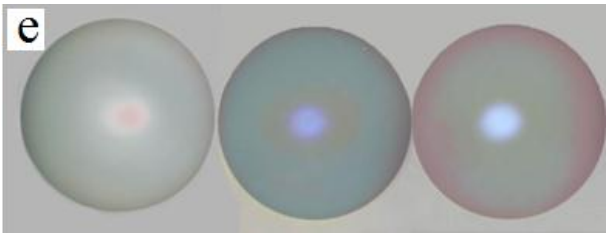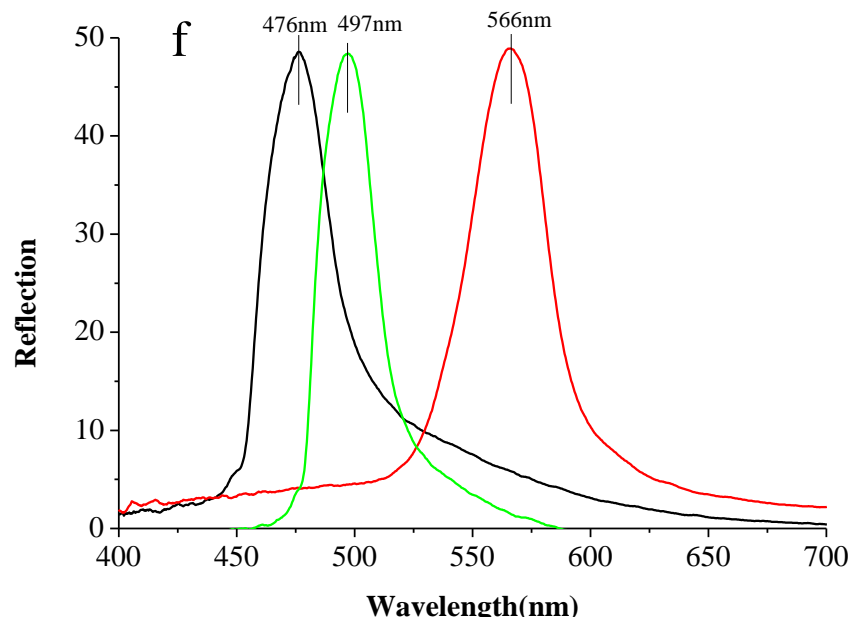

**Figure1S. The characteristics of SPCMs. (a, b) Low magnification of SPCMs; (c, d) the surfaces of SPCMs at high magnification; (e) The bright-field microscopic images of three kinds of SPCMs; (f) Reflectance spectra of three kinds of SPCMs.**

23

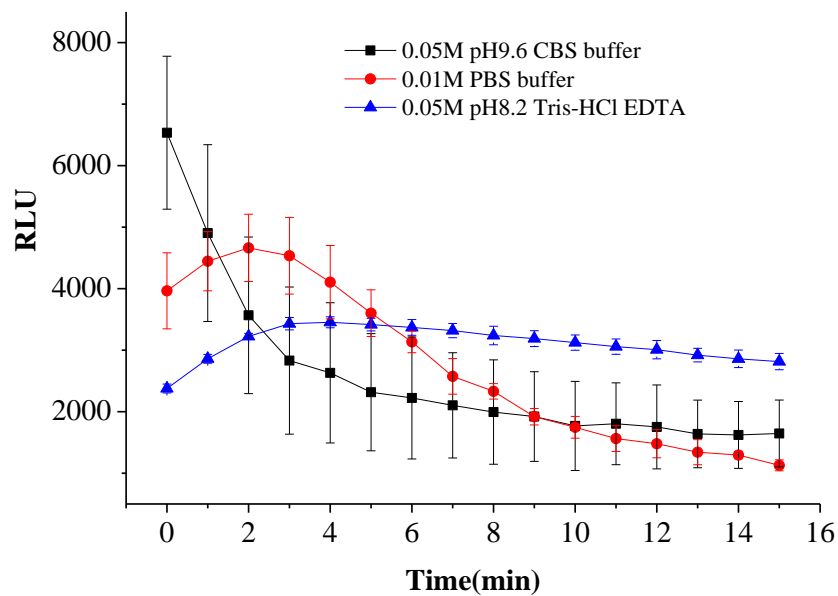

24

25 **Figure2S. The influences of CL substrate buffer solutions on the RLU. The concentrations of**  
26 **AFB1-BSA, AFB1 standard substrate and HRP-labeled second antibody were 500, 0.1 ng/mL**  
27 **and 1: 2000 dilution, respectively. The concentrations of luminol, PIP and H<sub>2</sub>O<sub>2</sub> were 0.5, 0.4**  
28 **and 4 mM, respectively.**

29

30

31

32

33

34

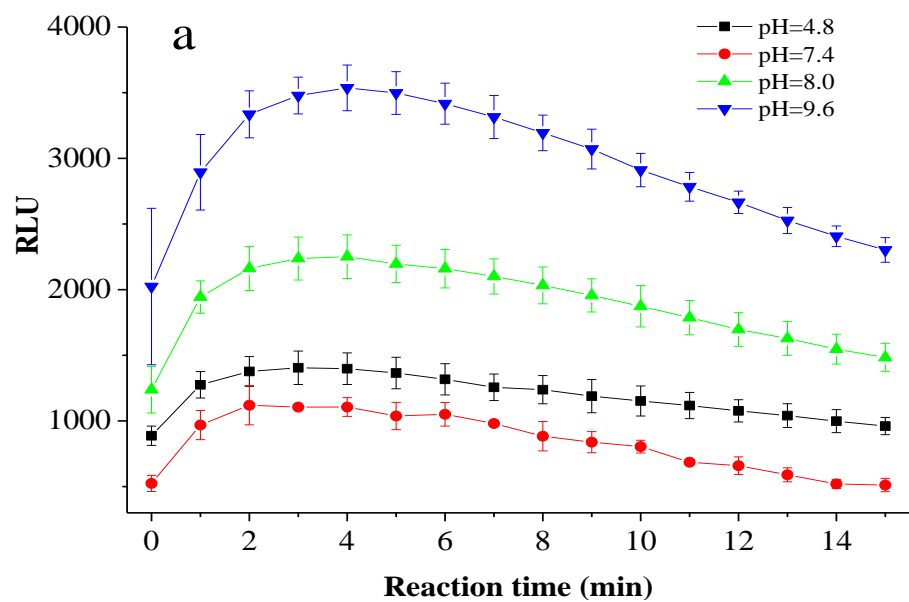

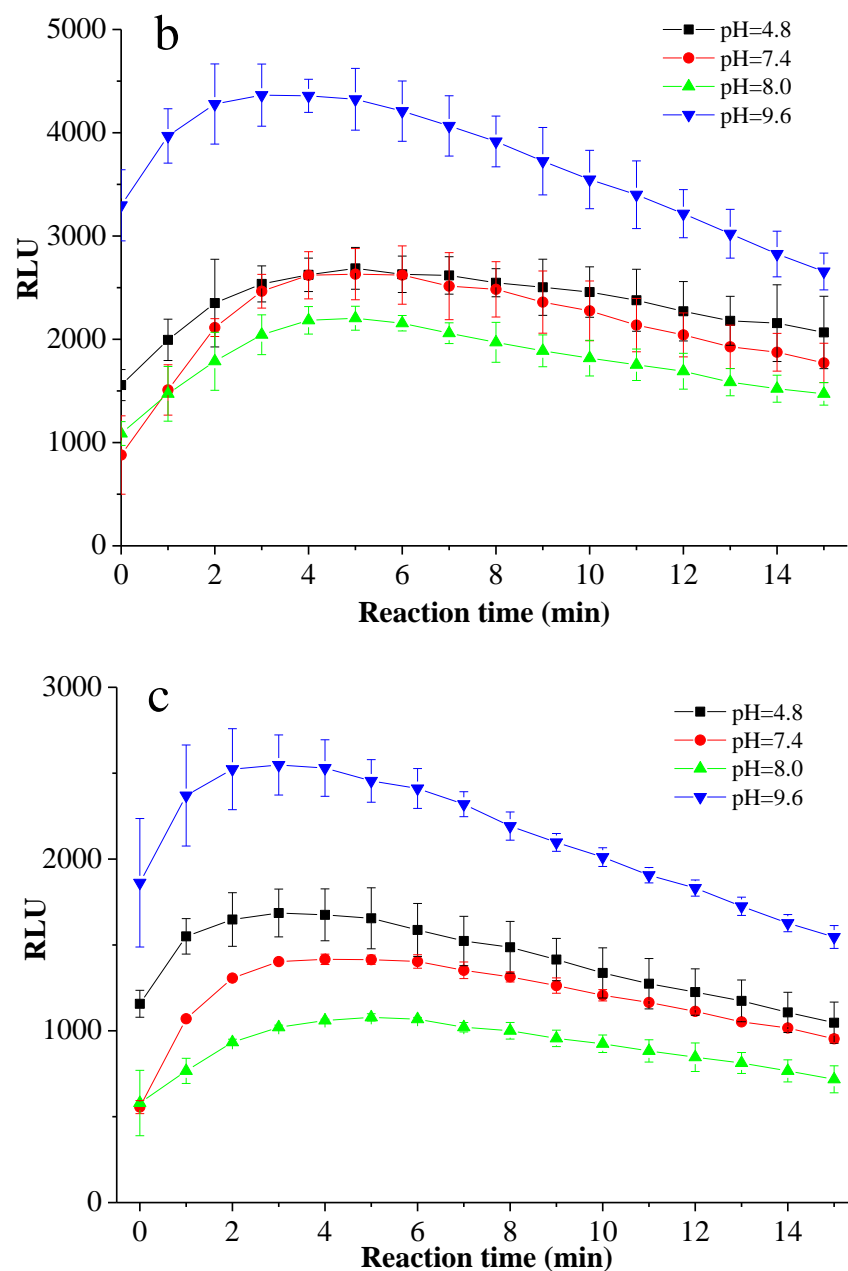

**Figure3S. The influences of the different pH buffer solution for immobilization medium of AFB1 (a), FB1 (b) and OTA (c) antigens and reaction time on the RLU. The concentration of AFB1-BSA, FB1-BSA and OTA-BSA was at 1200 ng/mL in pH from 4.8 to 9.6 buffer solutions, respectively. The concentration of AFB1, FB1, and OTA was at 1ng/mL. The concentration of AFB1-Ab, FB1-Ab and OTA-Ab was diluted with 1:10000. The concentration of HRP-labeled secondary antibody was diluted with 1:6000.**

52

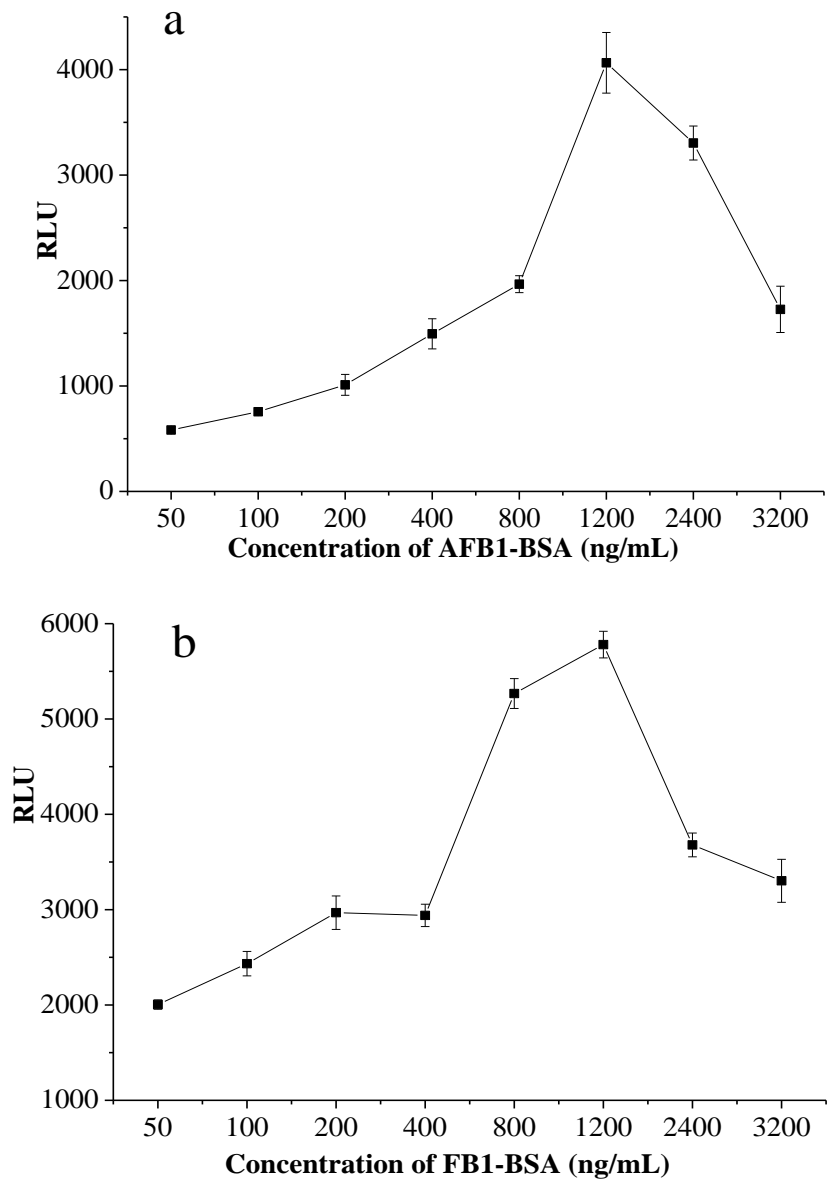

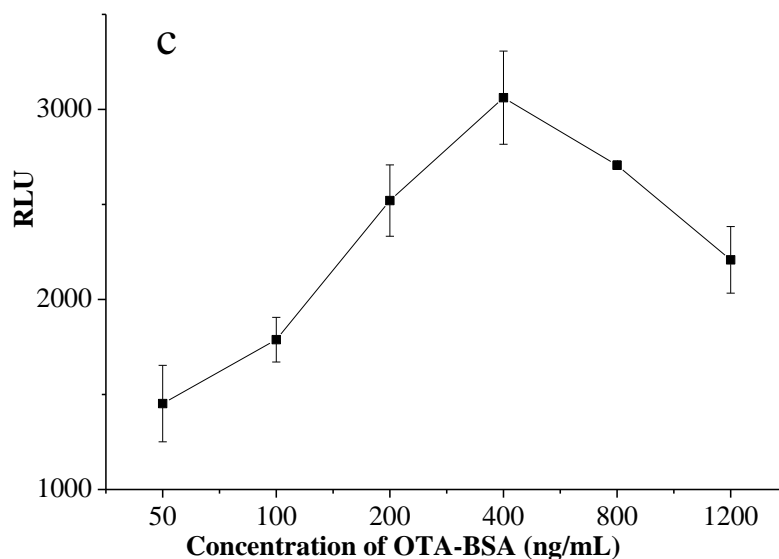

**Figure4S. The influence of different immobilization concentration of AFB1-BSA (a) FB<sub>1</sub>-BSA (b) and OTA-BSA (c) on the RLU. The concentrations of standard substrate, primary antibody and HRP-labeled secondary antibody for AFB1, FB1 and OTA were 1ng/mL, dilution with 1:10000, and dilution with 1:6000 respectively.**

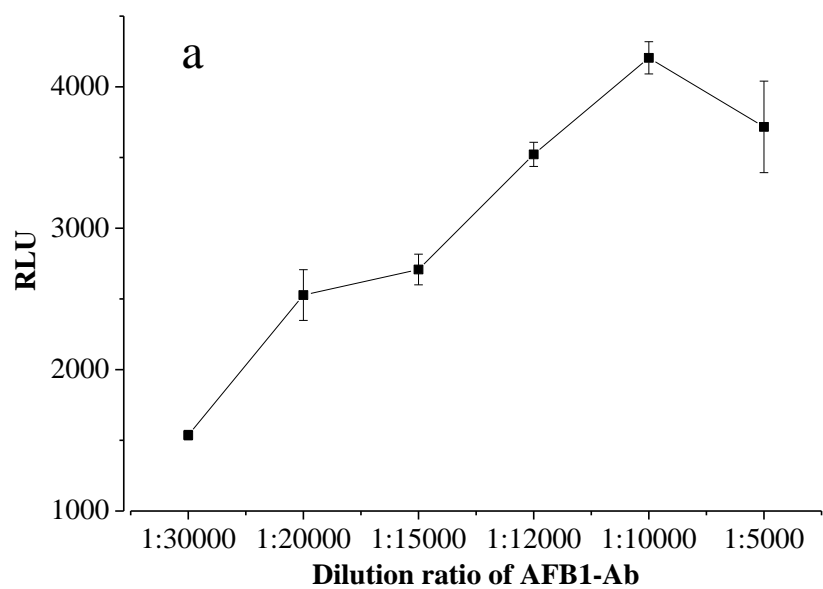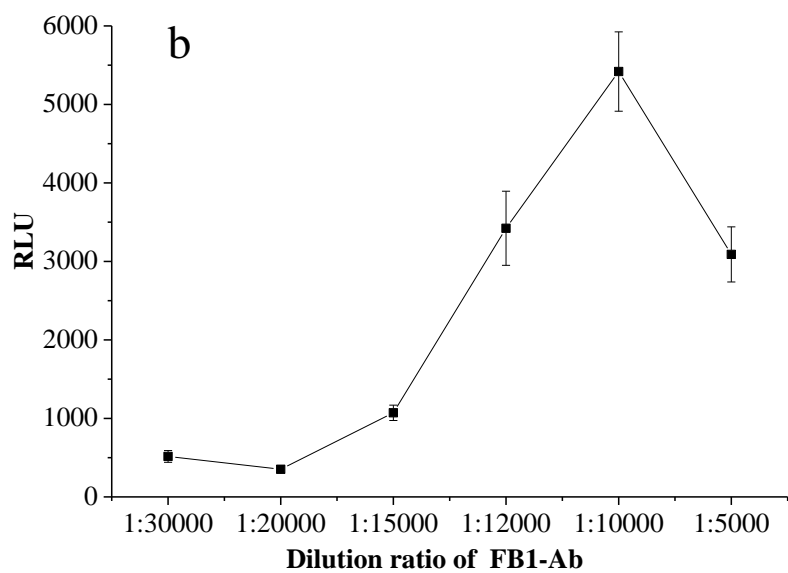

62



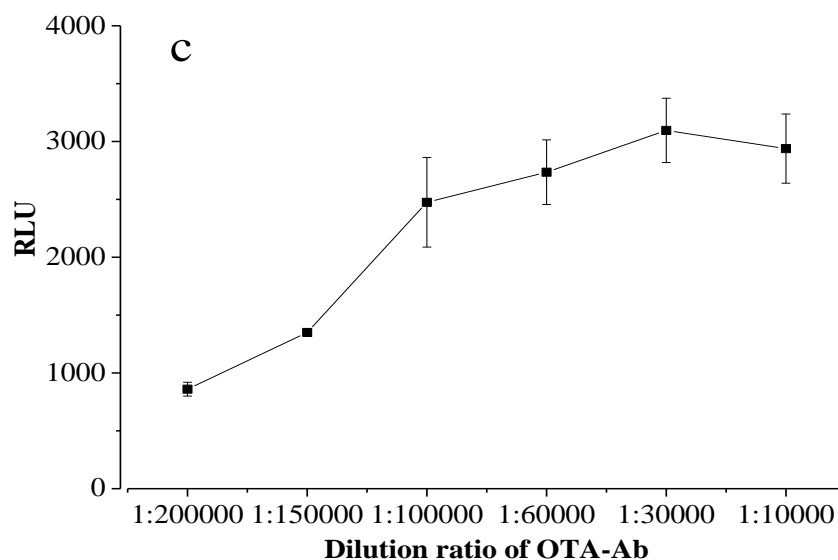

**Figure5S. The influence of different dilution ratio of AFB1-Ab (a), FB<sub>1</sub>-Ab (b) and OTA-Ab (c) on the RLU. The immobilization concentrations of AFB1-BSA, FB<sub>1</sub>-BSA, and OTA-BSA were 1200ng/mL, 1200ng/mL, and 400ng/mL, respectively. The concentrations of standard substrate and HRP-labeled secondary antibody for AFB<sub>1</sub>, FB<sub>1</sub> and OTA were 1ng/mL, dilution with 1:6000 respectively.**

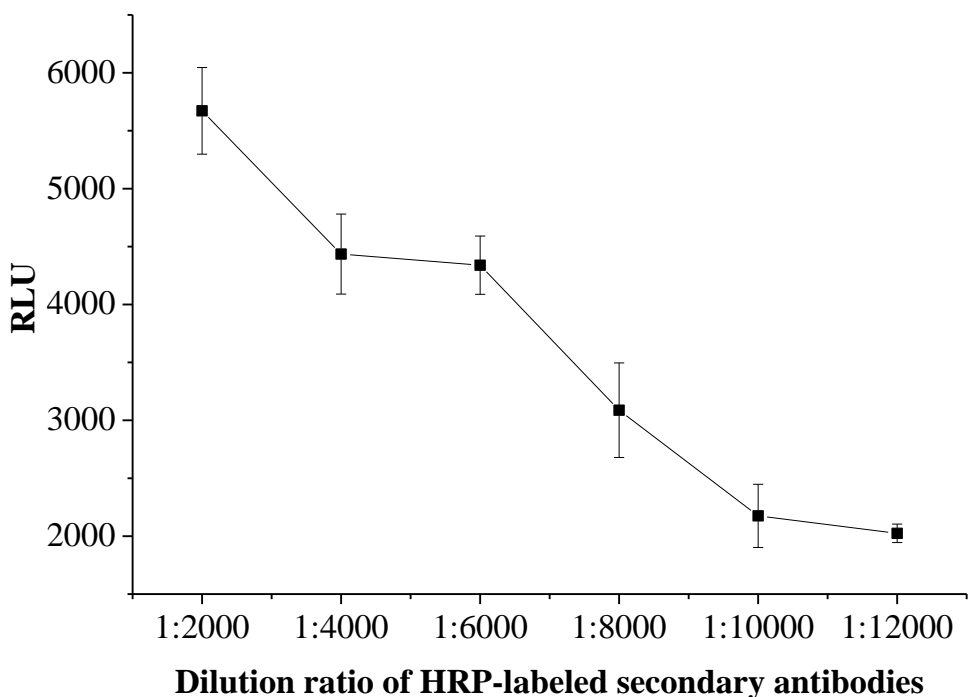

**Figure6S. The influence of different dilution ratio of HRP-labeled secondary antibodies on the RLU. The concentrations of AFB1-BSA, standard substrate, and primary antibody for AFB1 were 1200ng/mL, 1ng/mL, and dilution with 1:10000, respectively.**

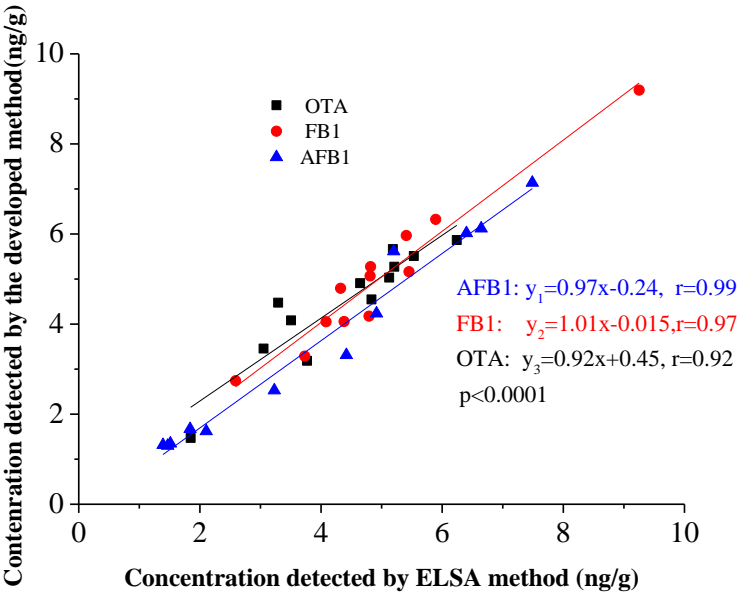

**Figure7S. The relationship between the developed method and the ELISA method for AFB1 (blue), FB1 (red) and OTA (black) detection in cereal samples.**

|      |      |      |      |  |
|------|------|------|------|--|
| a    |      |      |      |  |
| ng/g | AFB1 | FB1  | OTA  |  |
| 0.05 | 8.7% | 3.2% | 8.0% |  |
| 0.1  | 3.0% | 1.8% | 4.2% |  |
| 1    | 4.4% | 7.9% | 2.1% |  |

|      |       |       |       |  |
|------|-------|-------|-------|--|
| b    |       |       |       |  |
| ng/g | AFB1  | FB1   | OTA   |  |
| 0.05 | 6.9%  | 12.2% | 12.3% |  |
| 0.1  | 14.4% | 14.5% | 13.8% |  |
| 1    | 10.2% | 10.4% | 12.0% |  |

**Table1S. The precision of the suspension array for mycotoxin assay. Intra-assay variation coefficients (a) and interassay variation coefficients (b) with different concentrations of AFB1, FB1 and OTA. N=8**
